# Supplementary material for: Capsaicin alleviates doxorubicin-induced acute myocardial injury by regulating iron homeostasis and PI3K-Akt signaling pathway
Source: publisher site journal article supplement (doi:10.18632/aging.205138), 2023-11-01
Supplement: Supplementary file [file aging-v15i21-205138-supplementary-material-SD1.pdf]

## SUPPLEMENTARY TABLE

**Supplementary Table 1. The sequence of qPCR primer.**

| <b>Name</b>   | <b>Forward primer (5'–3')</b> | <b>Reward primer (5'–3')</b> |
|---------------|-------------------------------|------------------------------|
| BNP (mouse)   | AAGTCCTAGCCAGTCTCCAGA         | GAGCTGTCTCTGGGCCATTTC        |
| GPX4 (mouse)  | CGCGATGATTGGCGCT              | CACACGAAACCCCTGTACTTATCC     |
| Gapdh (mouse) | ATCATCCCTGCATCCACT            | ATCCACGACGGACACATT           |
| Myh7 (mouse)  | GCTGAAAGCAGAAAGAGATTATC       | TGGAGTTCTTCTTTCTGGAG         |
| Ptgs2 (mouse) | GCGACATACTCAAGCAGGAGCA        | AGTGGTAACCGCTCAGGTGTTG       |
| Gapdh (rat)   | CCGCATCTTCTTGTGCAGTG          | GAGAAGGCAGCCCTGGTAAC         |
| Gpx4 (rat)    | CCGGCTACAATGTCAGGTTT          | ACGCAGCCGTTGTTATCAAT         |
| Ptgs2 (rat)   | ATGTTTCGATTCTTTGCCAG          | TACACCTCTCCACCGATGAC         |
